# Supplementary material for: Fluorescent Microspheres as Point Sources: A Localization Study
Source: PLOS journal article supplement (doi:10.1371/journal.pone.0134112), 2015-07-28
Supplement: S11 (10.1371/journal.pone.0134112.s011) [file journal.pone.0134112.s011]

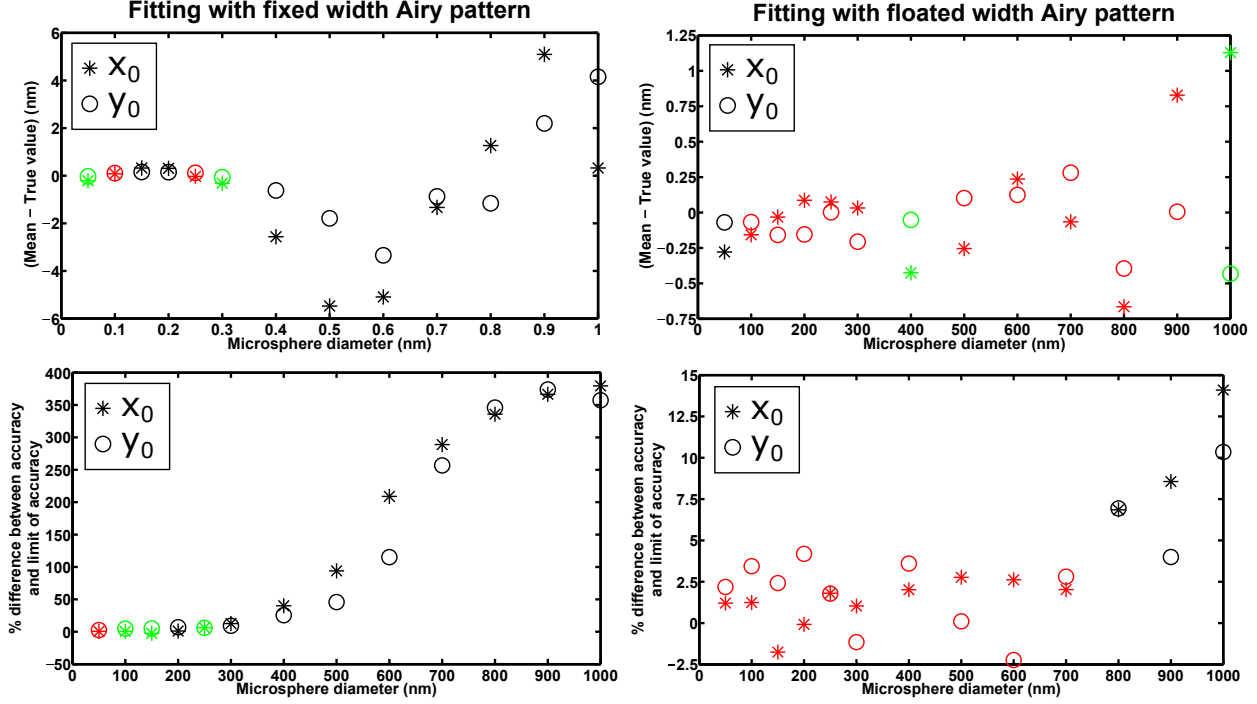

S11 Fig. Analysis of the mean and accuracy (i.e., standard deviation) of estimates from the maximum likelihood localization of microspheres with a fixed width (left-hand side plots) and a floated width (right-hand side plots) Airy pattern - second set of data sets statistically identical to the data sets of Fig. 7. Results are shown for 13 data sets, each consisting of 1000 repeat images of a microsphere of a different size, simulated with parameters specified in the section *Simulation parameters* for the  $\lambda = 485$  nm / 100 $\times$  combination, except the magnification has been changed to  $M = 160$  to yield a smaller effective pixel size of 100 nm, the ROI and the per-pixel mean background photon count have accordingly been changed to a 21 $\times$ 21-pixel array and  $\beta_0 = 30$ , respectively, to retain the detection of similar numbers of photons from the microsphere and the background component, and the lateral location of the microsphere has been changed to 10.3 pixels in the  $x$  direction and 10.1 pixels in the  $y$  direction within the ROI. For each data set, the difference between the mean of estimates and the true value for each positional coordinate, and the percentage difference between the localization accuracy and the limit of the localization accuracy for each positional coordinate, are color-coded as in Figs. 3 through 6.
